# Supplementary material for: Using the egg parasitoid Anastatus bifasciatus against the invasive brown marmorated stink bug in Europe: can non-target effects be ruled out?
Source: PubMed Central journal article supplement (PMC5978841; doi:10.1007/s10340-018-0969-x), 2018-03-21
Supplement: 10340_2018_969_MOESM1_ESM.pdf [file 10340_2018_969_MOESM1_ESM.pdf]

**Title: Using the egg parasitoid *Anastatus bifasciatus* against the invasive brown marmorated stink bug in Europe – can non-target effects be ruled out?**

Journal of Pest Science

Authors: Judith Stahl<sup>1,2\*</sup>, Dirk Babendreier<sup>1</sup>, Tim Haye<sup>1</sup>

<sup>1</sup> CABI, Rue des Grillons 1, 2800 Delémont, Switzerland

<sup>2</sup> Institute of Ecology and Evolutionary Biology, University of Bremen, Leobener Str. NW2, 28359 Bremen, Germany

\* Email: [j.stahl@cabi.org](mailto:j.stahl@cabi.org)

**Electronic Complementary Data:** Statistical results from bias-corrected logistic regression testing differences between the proportions of females producing offspring when offered either a non-target species or *H. halys* (control)

| Corresponding Figure | Non-target species    | Estimate | SE <sup>a</sup> | $\chi^2$ statistic | P value |
|----------------------|-----------------------|----------|-----------------|--------------------|---------|
| 1a                   | <i>C. fuscispinus</i> | -0.2440  | 0.551           | 0.20817            | 0.6482  |
|                      | <i>D. baccarum</i>    | -0.1937  | 0.675           | 0.08644            | 0.7688  |
|                      | <i>E. dominulus</i>   | -0.8056  | 0.525           | 2.44818            | 0.1152  |
|                      | <i>G. lineatum</i>    | -1.1553  | 0.476           | 6.70782            | 0.00960 |
|                      | <i>H. strictus</i>    | -2.3054  | 1.038           | 6.05309            | 0.01388 |
|                      | <i>N. viridula</i>    | -0.3515  | 0.626           | 0.32955            | 0.56592 |
|                      | <i>P. lituratus</i>   | -1.7512  | 0.533           | 12.4492            | < 0.001 |
|                      | <i>P. prasina</i>     | 0.0965   | 0.760           | 0.01736            | 0.89517 |
|                      | <i>C. marginatum</i>  | 0.0419   | 0.429           | 0.00984            | 0.9210  |
| 1b                   | <i>C. cossus</i>      | -5.0982  | 1.500           | 42.4568            | < 0.001 |
|                      | <i>E. versicolora</i> | 1.2024   | 0.746           | 2.93270            | 0.0868  |
|                      | <i>A. caja</i>        | -4.1776  | 1.496           | 23.5297            | < 0.001 |
|                      | <i>C. dilecta</i>     | 0.0770   | 1.178           | 0.00500            | 0.9436  |
|                      | <i>C. electa</i>      | -1.0201  | 1.002           | 1.20904            | 0.2715  |
|                      | <i>L. dispar</i>      | -4.5159  | 1.544           | 24.0357            | < 0.001 |
|                      | <i>L. salicis</i>     | -3.4965  | 1.589           | 9.65659            | 0.00189 |
|                      | <i>S. ocellata</i>    | -0.1115  | 0.491           | 0.05296            | 0.81800 |
|                      | <i>S. pinastri</i>    | 1.1410   | 0.544           | 4.69441            | 0.03026 |
| 1c                   | <i>D. pini</i>        | 0.4353   | 0.904           | 0.25544            | 0.6132  |
|                      | <i>E. potatoria</i>   | -2.7659  | 0.649           | 26.6149            | < 0.001 |
|                      | <i>G. quercifolia</i> | 2.6728   | 1.088           | 8.57731            | 0.00340 |
|                      | <i>L. quercus</i>     | -0.2095  | 0.484           | 0.19204            | 0.66122 |
|                      | <i>M. neustria</i>    | 1.8356   | 0.631           | 10.1888            | 0.00141 |
|                      | <i>O. pruni</i>       | 0.5100   | 0.498           | 1.10102            | 0.29404 |
|                      | <i>P. bucephala</i>   | 1.2826   | 0.815           | 2.80546            | 0.09394 |
|                      | <i>P. machaon</i>     | -1.0986  | 1.252           | 0.96568            | 0.32576 |
|                      | <i>S. cynthia</i>     | -0.4490  | 0.535           | 0.73429            | 0.39150 |
|                      | <i>S. pyri</i>        | 1.9322   | 0.776           | 7.53158            | 0.00606 |

<sup>a</sup> standard error of the coefficient estimate
